# Supplementary material
Source: PubMed Central journal article supplement (PMC5992119)
Supplement: mmc1.pdf [file mmc1.pdf]

**Supplemental Data**

**Mutations in the Epithelial Cadherin-p120-Catenin**

**Complex Cause Mendelian Non-Syndromic**

**Cleft Lip with or without Cleft Palate**

**Liza L. Cox, Timothy C. Cox, Lina M. Moreno Uribe, Ying Zhu, Chika T. Richter, Nichole Nidey, Jennifer M. Standley, Mei Deng, Elizabeth Blue, Jessica X. Chong, Yueqin Yang, Russ P. Carstens, Deepti Anand, Salil A. Lachke, Joshua D. Smith, Michael O. Dorschner, Bruce Bedell, Edwin Kirk, Anne V. Hing, Hanka Venselaar, Luz C. Valencia-Ramirez, Michael J. Bamshad, Ian A. Glass, Jonathan A. Cooper, Eric Haan, Deborah A. Nickerson, Hans van Bokhoven, Huiqing Zhou, Katy N. Krahn, Michael F. Buckley, Jeffrey C. Murray, Andrew C. Lidral, and Tony Roscioli**

**Table S1: Additional Class 3 Variants**

| Gene           | Variant                                     | Domain                                                             | Splice Prediction                | Family   | Origin      | Family Structure                       | Cohort      | gnomAD              | ACMG                  | Interpretation/ Comments                                                            |
|----------------|---------------------------------------------|--------------------------------------------------------------------|----------------------------------|----------|-------------|----------------------------------------|-------------|---------------------|-----------------------|-------------------------------------------------------------------------------------|
| <i>CTNND1</i>  | chr11:g.57572251A>G<br>p.Lys574Arg          | ARM5,<br>abolishes salt<br>bridge<br>AA577/855                     | Reduced at<br>following<br>base  | 2328     | Philippines | Singleton                              | Replication | Nil                 | PM1, PM2,<br>PP3      | Class 3C VOUS<br>Interacts with <i>CDH1</i> Glu757                                  |
|                | chr11:g.57572217C>G<br>p.Gln563Glu          | ARM5                                                               | -                                | 2328     | Philippines | Singleton                              | Replication | Nil                 | PM1, PM2,<br>PP3      | Class 3C VOUS                                                                       |
| <i>PLEKHA5</i> | chr12:g.19427853A>G<br>p.Met411Val          | -                                                                  | -                                | 20020088 | Philippines | Singleton                              | Replication | 1 NFE,<br>1 EA      | PM2,<br>PP3           | Class 3C VOUS                                                                       |
|                | chr12:g.19506842T>G<br>p.Val849Gly          | -                                                                  | Possible<br>Upstream<br>Acceptor | 6049     | USA         | Singleton                              | Replication | 2 A, 3 SA,<br>2 O   | PM2, PP3              | Class 3C VOUS                                                                       |
|                | chr12:g.19506917A>T<br>p.Lys874Met          | -                                                                  | -                                | 20002102 | Philippines | Multi-affected<br>AD                   | Replication | 4 EA, 3 O,<br>1 A   | PM2, PP3              | Class 3C VOUS                                                                       |
|                | chr12:g.19506917A>T<br>p.Lys874Met          | -                                                                  | -                                | 20010335 | Philippines | Multi-affected<br>AD                   | Replication | 4 EA, 3 O,<br>1 A   | PM2, PP3              | Class 3C VOUS                                                                       |
|                | chr12:g.19436560G>A<br>p.Gly548Arg          | CTNND1<br>interaction<br>domain                                    | New<br>Acceptor<br>Site          | 20020446 | Philippines | Multi-affected<br>AD                   | Replication | 2 L, 1 EA,<br>1 NFE | PM1, PP2,<br>PP3, BS4 | Class 3B VOUS                                                                       |
| <i>PLEKHA7</i> | chr11:g.17035896C>A<br>p.Gly18Val           | WW domain                                                          | -                                | 20013646 | Philippines | Singleton                              | Replication | Nil                 | PM1, PM2,<br>PP3      | Class 3B VOUS                                                                       |
|                | chr11:g.16872791C>T<br>p.Val215Met          | PH Domain                                                          | -                                | 20000506 | Philippines | Multi-affected<br>AD non-<br>penetrant | Replication | 1 NFE               | PM1, PM2              | Class 3B VOUS                                                                       |
|                | chr11:g.16848096T>A<br>p.Asn305Ile          | -                                                                  | -                                | 20040014 | USA         | Singleton                              | Replication | 3 Asj,<br>1 NFE     | PM2, PP3              | Class 3B VOUS                                                                       |
| <i>ESRP2</i>   | chr16:g.68266552C>T<br>p.Arg250Gln          | 1 <sup>st</sup> RNA<br>recognition<br>motif                        | -                                | CSc167   | USA         | Singleton                              | Replication | 3 EA, 1 A           | PM1, PM2,<br>PP3      | Class 3C VOUS, Residue<br>conserved in all ESRP1/2<br>proteins to <i>C. elegans</i> |
|                | chr16:g.68265269G>A<br>p.Ser508Leu          | 3 <sup>rd</sup> RNA<br>recognition<br>motif / H-bond<br>disruption | -                                | 20040446 | Philippines | Multi-affected<br>AD                   | Replication | 2 NFE,<br>1 SA      | PM1, PM2,<br>PP3      | Class 3C VOUS                                                                       |
|                | chr16:g.68265151_68265153del<br>p.Glu547del | Third RNA<br>recognition<br>motif                                  | -                                | 20021591 | Philippines | Singleton                              | Replication | 2 A, 2 NFE,<br>1 L  | PM1, PM2,<br>BP5      | Class 3C VOUS                                                                       |

Abbreviations: Asj – Ashkenazi Jewish, NFE – Non-Finnish European, L – Latino, O – Other, SA – South Asian, FE- Finnish European, AD – Autosomal Dominant

Table S2: CLP gene expression in mouse epithelial tissues. A) Heat maps (gradient of orange to yellow) represents high to low expression. Examples of previously known CLP gene (grey). CLP genes reported in this paper (olive). Analysis in B) emphasizes the prominent expression of CLP genes in the maxillary epithelium.

| Gene symbol                                                                              | E10.5. Central Neural Epithelium | E10.5. Flanking Neural Epithelium | E10.5. Lateral Eminence Neural Epithelium | E10.5. Mandibular Columnar Epithelium | E10.5. Medial Eminence Neural Epithelium | E10.5. Maxillary Columnar Epithelium | E10.5. Medial Neuro-Epithelium |
|------------------------------------------------------------------------------------------|----------------------------------|-----------------------------------|-------------------------------------------|---------------------------------------|------------------------------------------|--------------------------------------|--------------------------------|
| <b>A) Heatmap of all genes compared with respect to each other in all listed tissues</b> |                                  |                                   |                                           |                                       |                                          |                                      |                                |
| Arhgap29                                                                                 | 38.07                            | 38.72                             | 39.74                                     | 58.04                                 | 38.11                                    | 48.65                                | 38.87                          |
| Irf6                                                                                     | 46.56                            | 47.59                             | 57.22                                     | 83.55                                 | 47.66                                    | 96.10                                | 62.16                          |
| Pvr11                                                                                    | 69.68                            | 93.92                             | 80.22                                     | 96.87                                 | 66.37                                    | 139.63                               | 87.09                          |
| Fgfr2                                                                                    | 32.08                            | 43.36                             | 38.56                                     | 70.38                                 | 32.43                                    | 52.46                                | 36.59                          |
| Tfap2a                                                                                   | 33.02                            | 30.00                             | 35.53                                     | 95.65                                 | 34.40                                    | 58.88                                | 35.88                          |
| Cdh1                                                                                     | 52.43                            | 56.02                             | 54.55                                     | 75.06                                 | 50.35                                    | 92.12                                | 59.11                          |
| Esrp2                                                                                    | 52.13                            | 41.97                             | 58.53                                     | 63.08                                 | 42.04                                    | 144.44                               | 72.78                          |
| Plekha5                                                                                  | 36.67                            | 44.64                             | 27.38                                     | 25.40                                 | 46.30                                    | 36.12                                | 26.80                          |
| Ctnnd1                                                                                   | 73.67                            | 71.99                             | 70.46                                     | 53.61                                 | 73.09                                    | 69.07                                | 59.86                          |
| Plekha7                                                                                  | 67.05                            | 61.61                             | 59.87                                     | 59.87                                 | 55.38                                    | 66.16                                | 56.51                          |
| <b>B) Gene-specific (row-wise) heatmap expression in all listed tissues</b>              |                                  |                                   |                                           |                                       |                                          |                                      |                                |
| Arhgap29                                                                                 | 38.07                            | 38.72                             | 39.74                                     | 58.04                                 | 38.11                                    | 48.65                                | 38.87                          |
| Irf6                                                                                     | 46.56                            | 47.59                             | 57.22                                     | 83.55                                 | 47.66                                    | 96.10                                | 62.16                          |
| Pvr11                                                                                    | 69.68                            | 93.92                             | 80.22                                     | 96.87                                 | 66.37                                    | 139.63                               | 87.09                          |
| Fgfr2                                                                                    | 32.08                            | 43.36                             | 38.56                                     | 70.38                                 | 32.43                                    | 52.46                                | 36.59                          |
| Tfap2a                                                                                   | 33.02                            | 30.00                             | 35.53                                     | 95.65                                 | 34.40                                    | 58.88                                | 35.88                          |
| Cdh1                                                                                     | 52.43                            | 56.02                             | 54.55                                     | 75.06                                 | 50.35                                    | 92.12                                | 59.11                          |
| Esrp2                                                                                    | 52.13                            | 41.97                             | 58.53                                     | 63.08                                 | 42.04                                    | 144.44                               | 72.78                          |
| Plekha5                                                                                  | 36.67                            | 44.64                             | 27.38                                     | 25.40                                 | 46.30                                    | 36.12                                | 26.80                          |
| Ctnnd1                                                                                   | 73.67                            | 71.99                             | 70.46                                     | 53.61                                 | 73.09                                    | 69.07                                | 59.86                          |
| Plekha7                                                                                  | 67.05                            | 61.61                             | 59.87                                     | 59.87                                 | 55.38                                    | 66.16                                | 56.51                          |
